# Supplementary material for: Imaging-guided focused ultrasound-induced thermal and sonodynamic effects of nanosonosensitizers for synergistic enhancement of glioblastoma therapy
Source: Royal Society of Chemistry journal article supplement (doi:10.1039/c9bm00292h), 2019-01-01
Supplement: c9bm00292h1.pdf [file c9bm00292h1.pdf]

## Supporting Information

### **Imaging-guided focused ultrasound-induced thermal and sonodynamic effects of nanosonosensitizers for synergistic enhancement of glioblastoma therapy**

Qian Wan,<sup>#a,b</sup> Chao Zou,<sup>#a</sup> Dehong Hu,<sup>a</sup> Jun Zhou,<sup>c</sup> Mengjie Chen,<sup>c</sup> Changjun Tie,<sup>a</sup> Yangzi Qiao,<sup>a</sup> Fei Yan,<sup>a</sup> Chuanli Cheng,<sup>a</sup> Zonghai Sheng,<sup>a</sup> Bing Zhang,<sup>\*d</sup> Xin Liu,<sup>\*a</sup> Dong Liang,<sup>\*a</sup> Hairong Zheng<sup>a</sup>

*a.* Paul C. Lauterbur Research Center for Biomedical Imaging, Institute of Biomedical and Health Engineering, Shenzhen Institutes of Advance Technology, Chinese Academy of Sciences, Shenzhen 518055, P. R. China

*b.* Shenzhen College of Advanced Technology, University of Chinese Academy of Sciences, Shenzhen 518055, P. R. China

*c.* Department of Ultrasound, The First College of Clinical Medical Sciences, China Three Gorges University, Yichang 443000, P. R. China

*d.* The Affiliated Drum Tower Hospital of Nanjing University Medical School, Jiangsu 210008, P. R. China

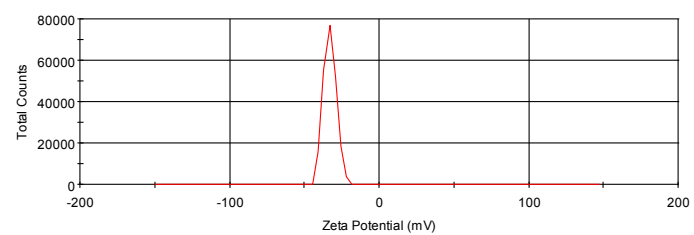

**Fig. S1** The zeta potential of HCM NAs.

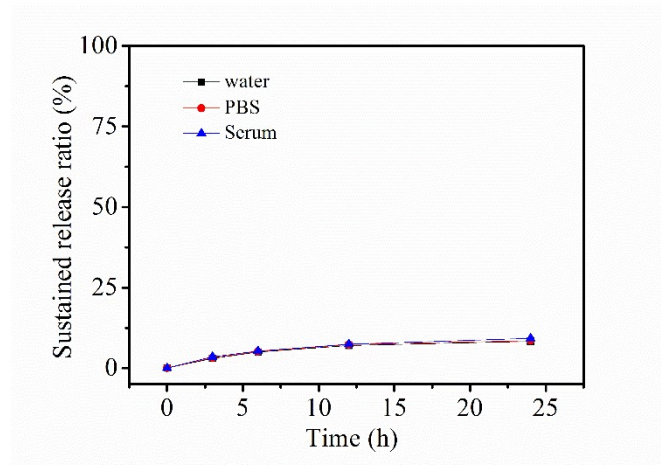

**Fig. S2** Sustained release profiles of HCM NAs in different solutions.

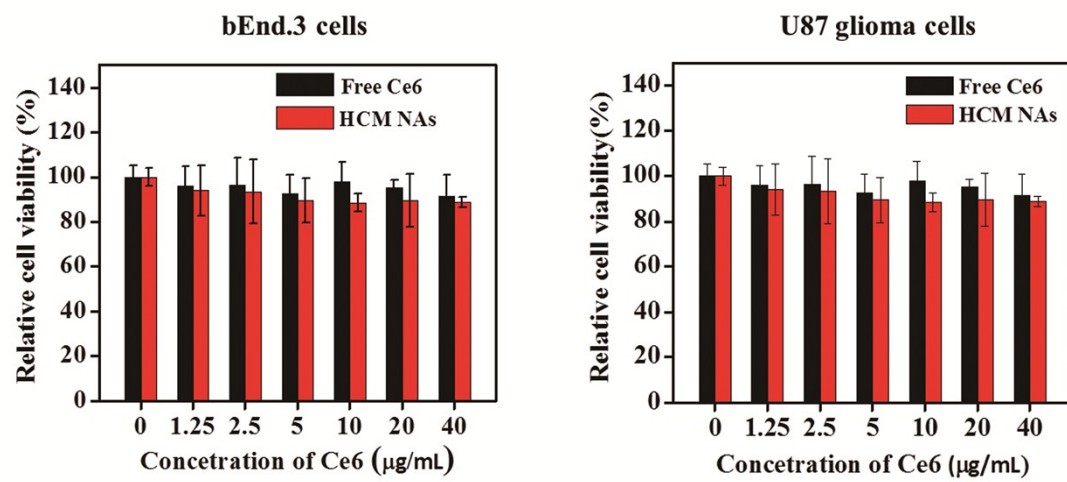

**Fig. S 3** Relative viability of bEnd.3 cells and U87 glioma cells incubated with various concentrations of HCM NAs or free Ce6 for 24 h.

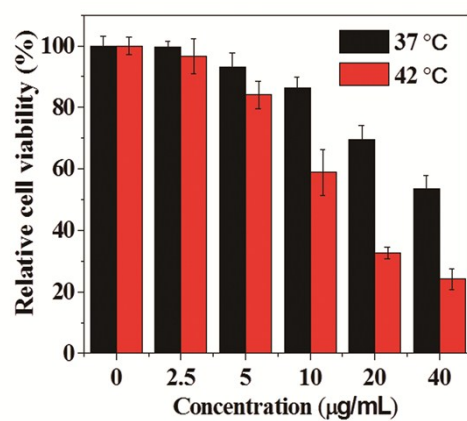

**Fig. S 4** Relative viability of U87 glioma cells incubated with various concentrations of HCM NAs or free Ce6 for 24 h after irradiation by focused ultrasound at 37°C and 42 °C, respectively (1 W/cm<sup>2</sup>, 2 min).

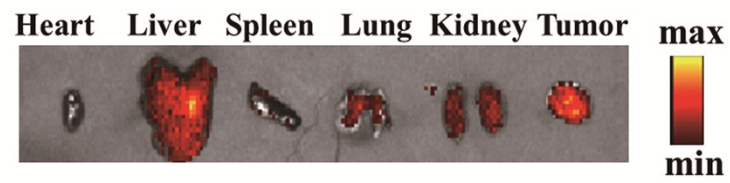

**Fig. S 5** *Ex vivo* fluorescence images of major organs and tumor dissected from mice injected HCM NAs at 24 h.

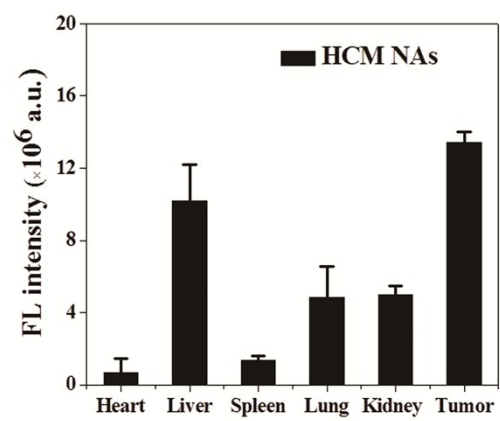

**Fig. S 6** Quantitative analysis of fluorescence intensity of major organs and tumors after 24 h postinjection.

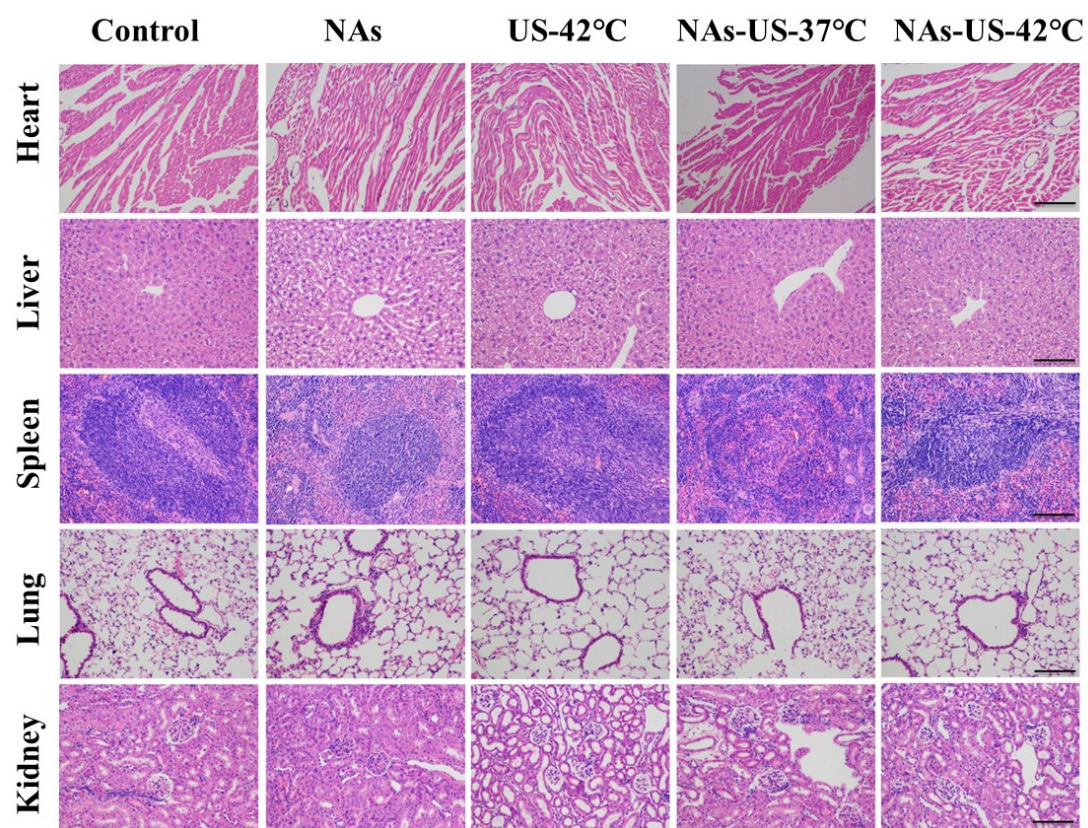

**Fig. S 7** H&E staining images of major organs collected from different treated groups.



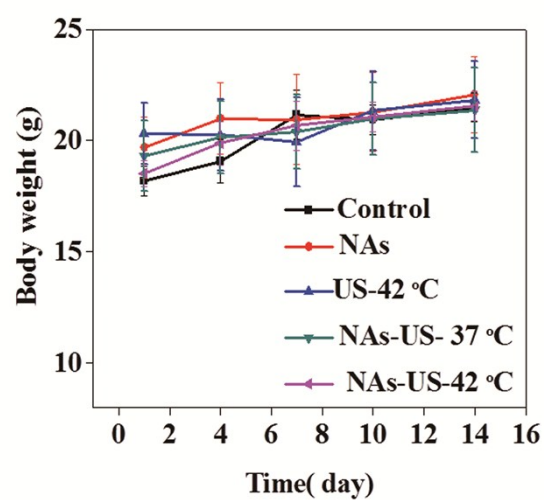

**Fig. S 8** Body weight of different treatment group during the 14 day evaluation period.
